# Supplementary material for: Morphology controlled nano-structures of an octa(phenoxy)-substituted phthalocyaninato zinc complex: solvent effect on the self-assembly behaviour
Source: Royal Society of Chemistry journal article supplement (doi:10.1039/c3ra44687e), 2014-01-01
Supplement: c3ra44687e1.pdf [file c3ra44687e1.pdf]

## Electronic supplementary information

# Morphology Controlled Nano-structures of an Octa(phenoxy)- substituted Phthalocyaninato Zinc complex: Solvent Effect on the Self-assembly Behavior

Xia Zhang,<sup>a</sup> Dameng Gao,<sup>a</sup> Jian Gao,<sup>a</sup> Peihua Zhu,<sup>a</sup> and Marcel Bouvet,<sup>b</sup> Yanli Chen,<sup>\*a</sup>

<sup>a</sup> Shandong Provincial Key Laboratory of Fluorine Chemistry and Chemical Materials,  
School of Chemistry and Chemical Engineering, University of Jinan, Jinan 250022, P. R.  
China. E-mail: [chm\\_chenyl@ujn.edu.cn](mailto:chm_chenyl@ujn.edu.cn)

<sup>b</sup> Institut de Chimie Moléculaire de l'Université de Bourgogne, CNRS UMR  
5260, Université de Bourgogne Dijon, 21078 (France)

## Table of Contents

**1. Preparation of Zn[Pc(OPh)<sub>8</sub>]**

**2. Fig. S1-S3**

## Preparation of Zn[Pc(OPh)<sub>8</sub>]

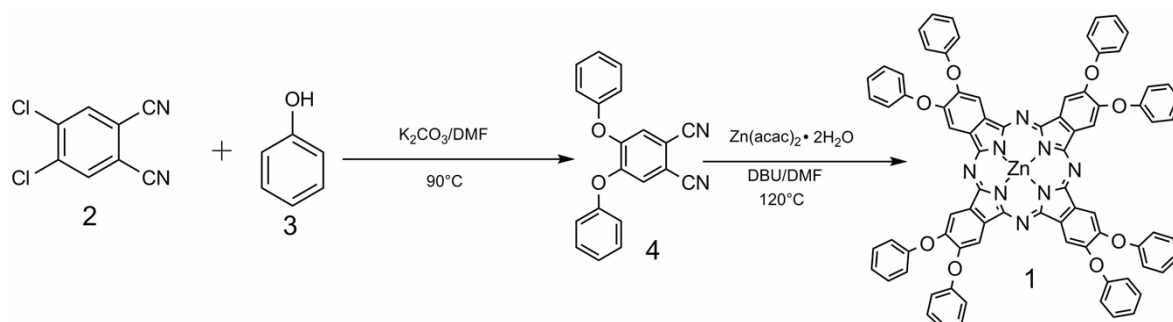

**Scheme S1.** Preparation of 2,3,9,10,16,17,24,25-octakis (phenoxy) phthalocyanine (Zn[Pc(OPh)<sub>8</sub>])

**Preparation of 4,5-di(phenoxy)phthalonitrile (4) :** Compound 4 was prepared according to a general procedure.<sup>1</sup> 4,5-Dichloro-1,2-dicyanobenzene (2) (1.97g, 10 mmol) and 60 mmol of a phenol compound (3) were heated at 90°C in DMF (20 mL) with stirring under N<sub>2</sub>. K<sub>2</sub>CO<sub>3</sub> powder (2.76 g, 20 mmol) was added in portions (8 × 20 mmol) every 5 min. The mixture was heated for a further 30 min. After cooling the mixture was added to 200 mL of cold water, filtered and the product was recrystallised from MeOH.

### **Preparation of 2,3,9,10,16,17,24,25-octakis(phenoxy)phthalocyaninato zinc (1) :**

Compound 1 was synthesized and purified according to published procedures.<sup>2</sup> A mixture of 4 (55 mg, 0.1 mmol), Zn(OAc)<sub>2</sub>·2H<sub>2</sub>O (55 mg, 0.25 mmol), and 1,8-diazabicyclo[5.4.0]undec-7-ene (DBU, 50 mg) in DMF (5 mL) was heated at 120°C under a slow stream of nitrogen overnight. After cooling to room temperature, the volatiles were removed in vacuum. The residue was dissolved in CHCl<sub>3</sub> and subjected to chromatography on a silica gel column with CHCl<sub>3</sub>/CH<sub>3</sub>OH (9:1, v/v) as eluent. The first green band containing 1 was collected. Yield 70%, mp >275°C (Found: C, 73.59%, H, 3.68%; N, 8.70%. requires C, 73.70%; H, 3.70%; N, 8.72%);  $\nu_{\max}$  (KBr)/cm<sup>-1</sup> 748, 891, 1087, 1207, 1273, 1450, 1489, 1593, 1628; M<sup>+</sup>(m/z)

(Experimental value)1313.95, M<sup>+</sup> (m/z) (Calculated value) 1313.29.

## References

- 1 X. Yang, X. Xu, and H. F. Ji, *Journal of Physical Chemistry B*, 2008, **112**, 7196-7202.
- 2 S. E. Maree and T. Nyokong, *Journal of Porphyrins and Phthalocyanines*, 2001, **5**, 782-792.

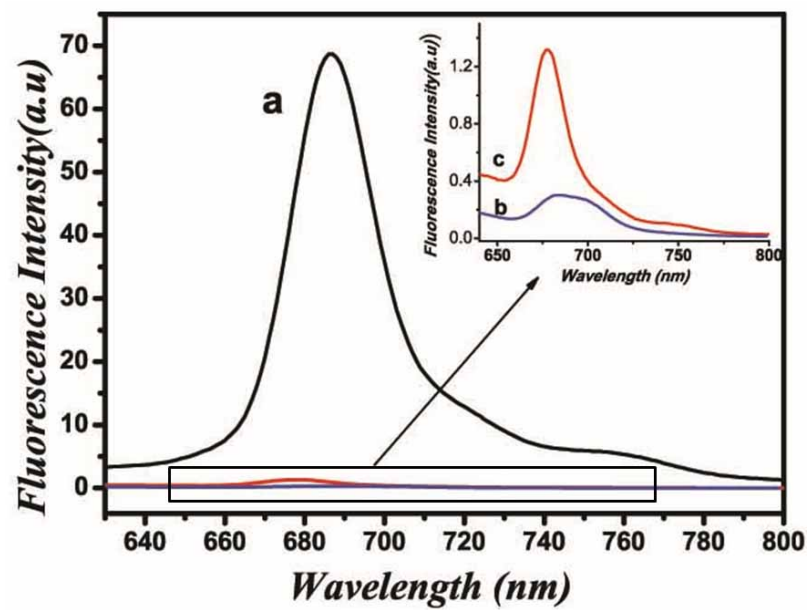

**Fig. S1.** Fluorescence spectra of Zn[Pc(OPh)<sub>8</sub>] in chloroform (a), its self-assembled nanostructures formed in *n*-hexane (b) and in methanol (c) ( $\lambda_{\text{ex}} = 590 \text{ nm}$ )

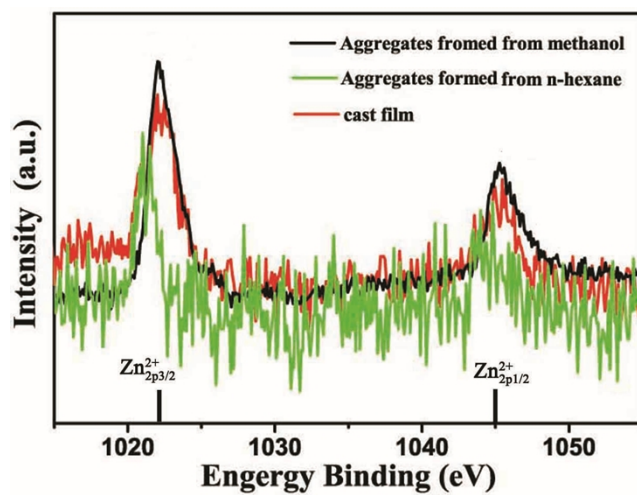

**Fig.S2.** X-ray photoelectron spectra of Zn[Pc(OPh)<sub>8</sub>] aggregates in methanol (black line), in *n*-hexane (green line) and the cast film (red line) deposited on silicon surface.

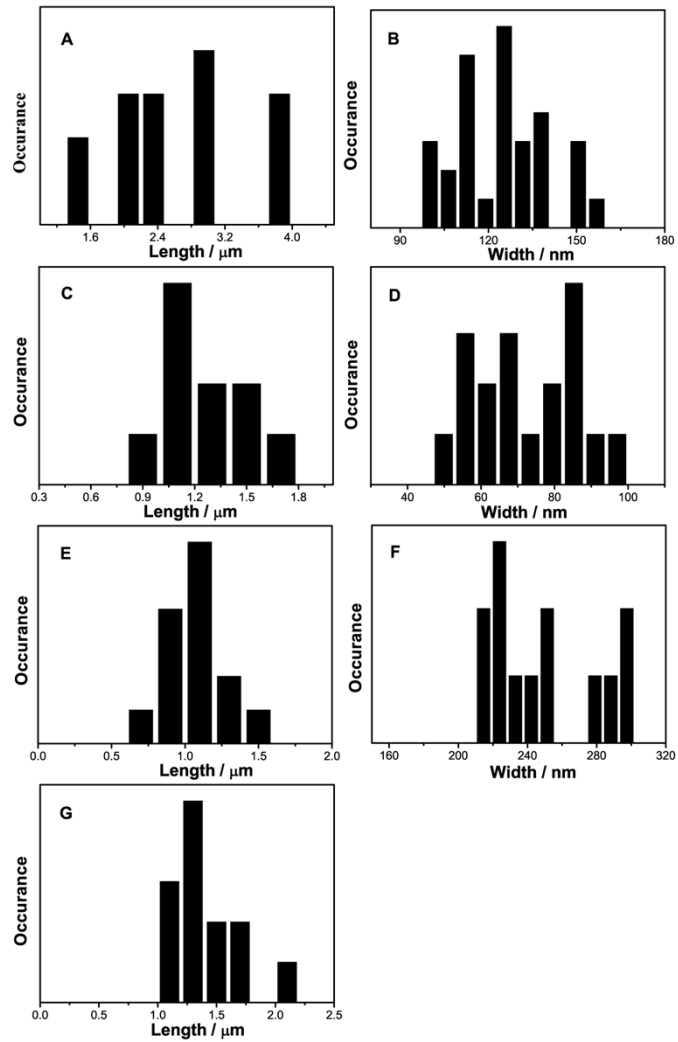

**Fig. S3.** The length and width distribution of the belts (A-B) and soft sticks (C-D), the diameter distribution of mushrooms in needle mushroom-like structures (E), the length distribution of needle mushrooms (F), and pine leaves (G).
